# Supplementary material for: Integrated analysis of competing endogenous RNA network revealing lncRNAs as potential prognostic biomarkers in human lung squamous cell carcinoma
Source: PubMed Central journal article supplement (PMC5630388; doi:10.18632/oncotarget.19627), 2017-07-27
Supplement: oncotarget-08-65997-s001.pdf [file oncotarget-08-65997-s001.pdf]

## Integrated analysis of competing endogenous RNA network revealing lncRNAs as potential prognostic biomarkers in human lung squamous cell carcinoma

### SUPPLEMENTARY MATERIALS

Supplementary Table 1: Dysregulated lncRNA in LUSC

| Regulated style | lncRNA                                                                                                                                                                                                                                                                                                                                                                                                                                                                                                                                                                                                                                                                                                                                   |
|-----------------|------------------------------------------------------------------------------------------------------------------------------------------------------------------------------------------------------------------------------------------------------------------------------------------------------------------------------------------------------------------------------------------------------------------------------------------------------------------------------------------------------------------------------------------------------------------------------------------------------------------------------------------------------------------------------------------------------------------------------------------|
| Down            | CYP2B7P, GGT3P, GGTA1P, HLA-DRB6, MEIS3P1, TRPC2, CMAHP, MBL1P, KIAA0087, LINC01558, LINC00312, LOC100499484-C9ORF174, LINC00341, LINC00472, AGPAT4-IT1, TUBA4B, MIR22HG, LOC90246, AOC4P, PSMG3-AS1, ZNF300P1, LINC00261, LINC00924, MGC27382, CHIAP2, ABCC13, UMODL1-AS1, LINC01105, WWC2-AS2, LINC00689, LINC00961, CYP4Z2P, ABHD11-AS1, DNMI1P46, SFTA1P, NAPS B, TRHDE-AS1, LINC00482, LINC00908, SIGLEC17P, LOC284578, CYP1B1-AS1, FLJ34503, KRTAP5-AS1, LINC01140, PWARN, CCL15-CCL14, PICSAR, TPTEP1, GVINP1, MIR99AHG, RPL13AP17, SIGLEC16, FLJ26850, C1orf140, WDFY3-AS2, PRR26, LINC00982, C5orf56, LOC441204, PGM5-AS1, PGM5P2, BCRP3, ABCC6P1, NCF1B, NCF1C, LHFPL3-AS2, ABCC6P2, SNORD116-4, LINC00930, LINC00092, BRE-AS1 |
| Up              | ALOX12P2, CYP2D7, PVT1, SPRR2C, AURKAPS1, SNHG1, PART1, DGCR5, PTTG3P, OR7E91P, FER1L4, AFAP1-AS1, LOC93429, TCAM1P, LOC148709, MSL3P1, HOXA11-AS, MIR9-3HG, LINC01559, LINC00319, LOC285629, DLX6-AS1, FIRRE, LINC00634, SOX2-OT, TPRXL, SLC6A10P, FMO6P, LOC399815, C1orf220, DDX12P, LOC440173, CDIPT-AS1, FAR2P1, GEMIN8P4, MIR31HG, DUSP5P1, KC6, LOC642846, LINC00520, RAET1K, MIR924HG, UCA1, SCARNA12, SNORD1C, SNHG4, LOC728554, DIRC3, HOTAIR, FAM86JP, TMPO-AS1, KTN1-AS1, LINC00887, LINC00704, LINC00173                                                                                                                                                                                                                    |

Supplementary Table 2: Dysregulated miRNA in LUSC

| Regulated style | miRNA            | Sequence                 |
|-----------------|------------------|--------------------------|
| Down            | hsa-miR-30a-5p   | UGUAAACAUCCUCGACUGGAAG   |
|                 | hsa-miR-30a-3p   | CUUUCAGUCGGAUGUUUGCAGC   |
|                 | hsa-miR-101-5p   | CAGUUAUCACAGUGCUGAUGCU   |
|                 | hsa-miR-30c-2-3p | CUGGGAGAAGGCUGUUUACUCU   |
|                 | hsa-miR-30d-5p   | UGUAAACAUCCCCGACUGGAAG   |
|                 | hsa-miR-30d-3p   | CUUUCAGUCAGAUGUUUGCUGC   |
|                 | hsa-miR-139-5p   | UCUACAGUGCACGUGUCUCCAGU  |
|                 | hsa-miR-139-3p   | UGGAGACGCGGCCUCGUUGGAGU  |
|                 | hsa-miR-218-5p   | UUGUGCUUGAUCUAACCAUGU    |
|                 | hsa-miR-133a-3p  | UUUGGUCCCCUUCAACCAGCUG   |
|                 | hsa-miR-144-5p   | GGAUAUCAUCAUAUACUGUAAG   |
|                 | hsa-miR-144-3p   | UACAGUAUAGAUGAUGUACU     |
|                 | hsa-miR-126-5p   | CAUUAUUACUUUUGGUACGCG    |
|                 | hsa-miR-190a-5p  | UGAUAUGUUUGAUAUAUUAGGU   |
|                 | hsa-miR-375      | UUUGUUCGUUCGGCUCGCGUGA   |
|                 | hsa-miR-326      | CCUCUGGGCCCUUCCUCCAG     |
|                 | hsa-miR-338-5p   | AACAAUAUCCUGGUGCUGAGUG   |
|                 | hsa-miR-338-3p   | UCCAGCAUCAGUGAUUUUGUUG   |
|                 | hsa-miR-133b     | UUUGGUCCCCUUCAACCAGCUA   |
|                 | hsa-miR-451a     | AAACCGUUACCAUUACUGAGUU   |
|                 | hsa-miR-486-5p   | UCCUGUACUGAGCUGCCCCGAG   |
|                 | hsa-miR-490-3p   | CAACCUGGAGGACUCCAUGCUG   |
|                 | hsa-miR-511-5p   | GUGUCUUUUGCUCUGCAGUCA    |
|                 | hsa-miR-497-5p   | CAGCAGCACACUGUGGUUUGU    |
|                 | hsa-miR-3065-3p  | UCAGCACCAGGAUAUUGUUGGAG  |
|                 | Up               | hsa-miR-31-5p            |
| hsa-miR-31-3p   |                  | UGCUAUGCCAACAUAUUGCCAU   |
| hsa-miR-96-5p   |                  | UUUGGCACUAGCACAUUUUUGCU  |
| hsa-miR-196a-5p |                  | UAGGUAGUUUCAUGUUGUUGGG   |
| hsa-miR-182-5p  |                  | UUUGGCAAUGGUAGAACUCACACU |
| hsa-miR-183-5p  |                  | UAUGGCACUGGUAGAAUUCACU   |
| hsa-miR-205-5p  |                  | UCCUUCAUCCACCGGAGUCUG    |
| hsa-miR-210-3p  |                  | CUGUGCGUGUGACAGCGGCUGA   |
| hsa-miR-9-5p    |                  | UCUUUGGUUAUCUAGCUGUAUGA  |
| hsa-miR-130b-5p |                  | ACUCUUUCCUGUUGCACUAC     |
| hsa-miR-130b-3p |                  | CAGUGCAAUGAUGAAAGGGCAU   |
| hsa-miR-196b-5p |                  | UAGGUAGUUUCCUGUUGUUGGG   |
| hsa-miR-629-3p  |                  | GUUCUCCAACGUAAGCCCAGC    |
| hsa-miR-708-5p  |                  | AAGGAGCUUACAUCUAGCUGGG   |
| hsa-miR-708-3p  |                  | CAACUAGACUGUGAGCUUCUAG   |
| hsa-miR-944     |                  | AAAUUAUUGUACAUCGGAUGAG   |
| hsa-miR-1269a   |                  | CUGGACUGAGCCGUGCUACUGG   |

**Supplementary Table 3: Dysregulated mRNA in LUSC**

See Supplementary File 1

**Supplementary Table 4: Dysregulated KEGG pathway and GO term in LUSC**

See Supplementary File 2
